# Supplementary material
Source: publisher figshare collection journal article supplement (https://sage.figshare.com/ndownloader/files/15253868)
Supplement: Supplementary file 1 [file 15253868]

## Sheet: suppl table 1F
ppModPeptide.ID	Sequence	Modifications	Mass	Proteins	Gene.Names	Protein.Names	Phospho..STY.	norm. Intensity PANC1	norm. Intensity PANC1	norm. Intensity PANC1R	norm. Intensity PANC1R	fc	pval
17	AAAVAAAGAGEPQSPDELLPK	Acetyl (Protein N-term);Phospho (STY)	2083.98	Q9NS69	TOMM22	Mitochondrial import receptor subunit TOM22 homolog	1	7.71323	7.6179	7.23069	7.28516	-2.55648	0.0319811
144	ADDQGCIEEQGVEDSANEDSVDAKPDR	Acetyl (Protein N-term);Phospho (STY)	3070.2	P55210-2;P55210	CASP7	Caspase-7;Caspase-7 subunit p20;Caspase-7 subunit p11	1	7.25871	7.24954	7.46629	7.47574	1.64773	0.000926024
147	ADEASELACPTPKEDGLAQQQTQLNLR	Phospho (STY)	3062.4	P49327	FASN	Fatty acid synthase;[Acyl-carrier-protein] S-acetyltransferase;[Acyl-carrier-protein] S-malonyltransferase;3-oxoacyl-[acyl-carrier-protein] synthase;3-oxoacyl-[acyl-carrier-protein] reductase;3-hydroxyacyl-[acyl-carrier-protein] dehydratase;Enoyl-[acyl-carrier-protein] reductase;Oleoyl-[acyl-carrier-protein] hydrolase	1	7.02769	7.08465	6.86084	6.80558	-1.67093	0.0303046
187	ADSGPTQPPLSLSPAPETK	Phospho (STY)	1971.92	J3KNL6;F1T0I1;O15027;O15027-5;O15027-2;O15027-4;O15027-3	SEC16A	Protein transport protein Sec16A	1	7.33736	7.33375	7.1349	7.11235	-1.62902	0.0298354
394	AHGLSLIPSTGLCSPDLVNR	Phospho (STY)	2186.06	O75030-11;O75030-10;O75030-9;O75030-12;O75030-4;O75030-3;O75030-8;O75030-7;O75030-6;O75030-2;O75030-5;O75030	MITF	Microphthalmia-associated transcription factor	1	6.77925	6.73582	6.30087	6.33099	-2.76445	0.00576919
514	ALENDFFNSPPRK	Phospho (STY)	1613.72	F5H148;H3BMT1;Q9NYV6-2;Q9NYV6-3;Q9NYV6;A6NIE6	RRN3;RRN3P2	RNA polymerase I-specific transcription initiation factor RRN3;Putative RRN3-like protein RRN3P2	1	7.21095	7.17856	6.7144	6.80342	-2.72798	0.0414363
569	ALSSAVQASPTSPGGSPSSPSSGQR	Phospho (STY)	2379.07	Q03164-2;Q03164;Q03164-3	KMT2A	Histone-lysine N-methyltransferase 2A;MLL cleavage product N320;MLL cleavage product C180	1	7.23166	7.22084	7.02333	6.98133	-1.67464	0.0465355
711	APVPSTCSSTFPEELSPPSHQAK	Phospho (STY)	2533.12	A0A087WY61;Q14980-2;Q14980;Q14980-5;Q14980-4;Q14980-3	NUMA1	Nuclear mitotic apparatus protein 1	1	7.59696	7.60656	7.49981	7.5079	-1.25286	0.00459257
714	APVSSTESVIQSNTPTPPPSQPLNETAEEESR	Phospho (STY)	3458.57	B5MBZ0;Q9HC35;Q9HC35-2	EML4	Echinoderm microtubule-associated protein-like 4	1	7.40554	7.60642	8.04148	8.24187	4.32213	0.0463703
808	ASASPDRIPSLPQETVDQEPK	Phospho (STY)	2344.09	Q76L82;Q8IXJ9	ASXH1;ASXL1	Putative Polycomb group protein ASXL1	1	6.88903	6.8758	6.56432	6.5043	-2.22899	0.0452586
834	ASGVAVSDGVIK	Phospho (STY)	1181.57	P23528	CFL1	Cofilin-1	1	6.46689	6.4414	6.66136	6.67453	1.63605	0.0131044
887	ASPPPQGPLPGPPGALHR	Phospho (STY)	1824.9	A0A087WXV6;Q96G74-2;Q96G74-3;Q96G74-5;Q96G74	OTUD5	OTU domain-containing protein 5	1	7.76427	7.70309	7.43588	7.41327	-2.03752	0.0393297
898	ASQEPSPKPGTEVIPAAPR	Phospho (STY)	2010.98	I3L1Y9;Q96CP2	FLYWCH2	FLYWCH family member 2	1	7.47513	7.34145	7.04734	6.94798	-2.57413	0.0453771
955	ATDIPASASPPPVAGVPFFKQSPGHQSPLASPK	3 Phospho (STY)	3522.6	Q8N1G0;F8WCX2;Q8N1G0-2	ZNF687	Zinc finger protein 687	3	7.14206	7.09185	6.8945	6.95408	-1.55834	0.0407834
1146	CRSLPSSPELPR	2 Phospho (STY)	1557.64	Q15569	TESK1	Dual specificity testis-specific protein kinase 1	2	6.68709	6.63994	6.48389	6.52117	-1.44872	0.0369995
1221	DAHDVSPTSTDTEAQLTVER	Phospho (STY)	2250.96	Q8IVF2-3;Q8IVF2	AHNAK2	Protein AHNAK2	1	9.04993	9.02974	8.85449	8.83336	-1.57004	0.00556193
1262	DCRSPGLLDTTPIR	Phospho (STY)	1679.77	Q8IY92-2;Q8IY92	SLX4	Structure-specific endonuclease subunit SLX4	1	7.19708	7.15277	6.95507	6.97586	-1.61978	0.0341697
1291	DDPDGKQEAKPQQAAGMLSPK	Oxidation (M);Phospho (STY)	2306.03	E7ETY2;Q13428-6;Q13428-7;Q13428-2;Q13428-8;Q13428;Q13428-3;Q13428-4	TCOF1	Treacle protein	1	6.32178	6.33789	6.48439	6.4511	1.37375	0.0398903
1514	DIEVLSEDTDYEEDEVTK	2 Phospho (STY)	2287.85	Q4LE39-2;Q4LE39;Q4LE39-4;Q4LE39-3	ARID4B	AT-rich interactive domain-containing protein 4B	2	7.14057	7.23312	7.53703	7.45584	2.03982	0.0386311
1553	DISPVLKDPASFR	Phospho (STY)	1523.74	H3BSW3;H3BQZ9;P07741-2;P07741	APRT	Adenine phosphoribosyltransferase	1	6.71678	6.68339	6.14159	6.22985	-3.26867	0.0321629
1742	DLQSPDFTTGFHSDKIEAK	Phospho (STY)	2214.98	E9PDR5;E7EPI0;Q9P2D0-2;Q9P2D0	IBTK	Inhibitor of Bruton tyrosine kinase	1	7.04401	7.19142	7.68546	7.52778	3.0825	0.0458191
1743	DLQYITVSKEELSSGDSLSPDPWKR	2 Phospho (STY)	3009.34	A8MQ02;J3KN01;P55196;P55196-5;P55196-3;P55196-1;Q5TIG5;P55196-2;P55196-6	MLLT4	Afadin	2	6.54232	6.52259	6.32713	6.36458	-1.53673	0.0277648
1892	DPYGSLDRHTQTVR	Phospho (STY)	1723.77	A1BQX2;A0A0G2JQ38;Q8N4S9-2;Q8N4S9-3;Q8N4S9	MARVELD2	MARVEL domain-containing protein 2	1	6.77222	6.77403	7.03908	7.03321	1.83242	0.00336881
1958	DRRPSVDAPVTDVGFLR	Phospho (STY)	1978.96	G3V3R5;Q9BUH8	BEGAIN	Brain-enriched guanylate kinase-associated protein	1	7.25197	7.25169	6.79075	6.75573	-3.01014	0.0232709
2016	DSHSSEEDEASSQTDLSQTISKK	2 Phospho (STY)	2668.04	A0A0A0MSK5;J3KN66;Q5JTV8-2;Q5JTV8;Q5JTV8-3	TOR1AIP1	Torsin-1A-interacting protein 1	2	7.67585	7.65317	7.85918	7.8616	1.56993	0.0348465
2126	DTTLIRHSPQPSPSSSFNEGLLTGGHR	2 Phospho (STY)	3050.36	Q9Y2J4;Q9Y2J4-2;Q9Y2J4-4;Q9Y2J4-3	AMOTL2	Angiomotin-like protein 2	2	7.02962	7.02591	7.17596	7.17184	1.40004	0.000386432
2168	DVLSPLRPSR	Phospho (STY)	1218.61	Q12756;Q12756-3;Q12756-2	KIF1A	Kinesin-like protein KIF1A	1	6.7413	6.79176	7.21222	7.15367	2.60866	0.00915856
2645	ELVGPPLAETVFTPKTSPENVQDR	2 Phospho (STY)	2783.28	P49792	RANBP2	E3 SUMO-protein ligase RanBP2	2	7.7522	7.74185	7.57147	7.56737	-1.50525	0.00755694
2749	EREESEDELEEANGNNPIDIEVDQNK	Phospho (STY)	3094.29	J3KN32;Q9UKL0	RCOR1	REST corepressor 1	1	8.25594	8.29396	8.12174	8.07779	-1.49686	0.0277396
2804	ESGVVAVSPEKSESPQKEDGLSSQLK	2 Phospho (STY)	2874.29	Q96T58	SPEN	Msx2-interacting protein	2	7.57286	7.63277	7.34457	7.27161	-1.97118	0.0270275
2948	EVVKPVPITSPAVSK	Phospho (STY)	1629.87	Q96HC4	PDLIM5	PDZ and LIM domain protein 5	1	7.08403	7.13466	6.80103	6.82385	-1.98106	0.0265064
3014	FDLSHGSPQMVR	Oxidation (M);Phospho (STY)	1468.62	A0A0A0MQW1;Q8IVT5-4;Q8IVT5-3;Q8IVT5-2;Q8IVT5	KSR1	Kinase suppressor of Ras 1	1	7.0735	7.02786	6.64866	6.70127	-2.37529	0.00908288
3174	FRMPSLR	Phospho (STY)	985.457	Q8IVF2-3;Q8IVF2;Q8IVF2-2	AHNAK2	Protein AHNAK2	1	6.63841	6.56257	6.29779	6.37157	-1.84421	0.0374609
3177	FRRSETPPHWR	2 Phospho (STY)	1627.68	E9PG73;Q13427	PPIG	Peptidyl-prolyl cis-trans isomerase G	2	7.9116	7.82124	8.2532	8.15807	2.18382	0.0356213
3615	GLGKPGGQGDAIQLSPK	Phospho (STY)	1701.85	Q5VV41	ARHGEF16	Rho guanine nucleotide exchange factor 16	1	7.03991	6.92123	7.51811	7.60096	3.79281	0.0209275
3624	GLLAQGLRPESPPPAGPLLNGAPAGESPQPK	Phospho (STY)	3095.58	Q96TA1-2;Q96TA1	FAM129B	Niban-like protein 1	1	8.46309	8.46889	8.36518	8.3815	-1.2378	0.0351561
3639	GLNPDGTPALSTLGGFSPASKPSSPR	2 Phospho (STY)	2670.21	C9JPL0;Q9UK58	CCNL1	Cyclin-L1	2	7.95079	8.00709	7.71376	7.75639	-1.75333	0.0244082
3657	GLSAPDLR	Phospho (STY)	907.416	Q9P266	KIAA1462	Junctional protein associated with coronary artery disease	1	6.79674	6.89651	6.47573	6.33406	-2.7652	0.0452148
3753	GPPDFSSDEEREPTPVLGSGAAAAGR	Phospho (STY)	2649.17	G5E972;P42167-3;P42167-2;P42167;P42166	TMPO	Lamina-associated polypeptide 2, isoforms beta/gamma;Thymopoietin;Thymopentin;Lamina-associated polypeptide 2, isoform alpha;Thymopoietin;Thymopentin	1	8.00472	7.95322	7.74408	7.67794	-1.85335	0.0272179
3784	GPTSTSIDNIDGTPVRDER	Phospho (STY)	2108.94	Q5VT52-2;Q5VT52-3;Q5VT52;Q5VT52-5	RPRD2	Regulation of nuclear pre-mRNA domain-containing protein 2	1	7.56051	7.52458	7.66374	7.69785	1.37485	0.0308206
3942	GSSQPNLSTSHSEQEYGK	Phospho (STY)	2014.83	O95208;E9PBC1;I3L2B2;O95208-3;O95208-2	EPN2	Epsin-2	1	7.53244	7.48058	7.81405	7.86731	2.15858	0.0121713
4138	HGESAWNLENR	Phospho (STY)	1391.56	P18669	PGAM1	Phosphoglycerate mutase 1	1	6.5518	6.47533	6.81777	6.74181	1.84599	0.0386258
4154	HGLQLGAQSPGR	Phospho (STY)	1299.61	Q8N1G0	ZNF687	Zinc finger protein 687	1	7.35761	7.35006	7.2615	7.23915	-1.26914	0.0469155
4219	HLAGYESSSTLMTSELESTSLGDSDEEDTMSR	Phospho (STY)	3544.44	I3L2N2;O14641	DVL2	Segment polarity protein dishevelled homolog DVL-2	1	7.65784	7.6869	7.48157	7.42487	-1.65632	0.0416357
4353	HSLLLSSSPNRIPSSR	Phospho (STY)	1829.91	G1UD79;Q7Z309-3;Q7Z309-4	SPACIA2;FAM122B	Protein FAM122B	1	7.41113	7.45916	7.08542	7.09776	-2.20572	0.0334719
4358	HSLSLDDIR	Phospho (STY)	1134.51	G3V4T7;Q96NE9-3;Q96NE9-2;Q96NE9	FRMD6	FERM domain-containing protein 6	1	7.462	7.37485	7.04516	6.96801	-2.58131	0.0201574
4404	HSYPPALGSPGALAGAGVGAAGPLER	Phospho (STY)	2452.19	Q96IF1	AJUBA	LIM domain-containing protein ajuba	1	7.32233	7.3077	7.21129	7.23412	-1.23683	0.0311724
4672	ILCLFRPQSGR	Phospho (STY)	1425.7	O43598;O43598-2	DNPH1	2'-deoxynucleoside 5'-phosphate N-hydrolase 1	1	6.61486	6.62256	6.3773	6.40322	-1.69219	0.0239516
4853	ISSKSPGHMVILDQTK	Phospho (STY)	1819.89	Q9NWH9;Q9NWH9-3	SLTM	SAFB-like transcription modulator	1	7.71198	7.72205	7.97693	7.98804	1.84275	0.000841877
4858	ISSLPVSRPISPSPSAILER	Phospho (STY)	2185.15	Q5T5P2;Q5T5P2-9;Q5T5P2-2;Q5T5P2-7;Q5T5P2-10;Q5T5P2-3;Q5T5P2-4;Q5T5P2-8;Q5T5P2-6	KIAA1217	Sickle tail protein homolog	1	7.19906	7.04886	6.62172	6.43316	-3.94924	0.0424267
4927	KAEQGSEEEGEGEEEEEEGGESKADDPYAHLSK	Phospho (STY)	3658.46	Q8NE71	ABCF1	ATP-binding cassette sub-family F member 1	1	8.13138	8.11089	8.18162	8.19845	1.17192	0.0378831
5031	KEGITGPPADSSKPIGPDDAIDALSSDFTCGSPTAAGK	Phospho (STY)	3809.73	B7Z574;A0A0C4DGB5;P20810-4;P20810-8;P20810;P20810-9;P20810-10;P20810-7;P20810-6;E9PDE4;E7EVY3	CAST	Calpastatin	1	7.67261	7.66692	7.37488	7.34586	-2.03891	0.024479
5249	KLDFNSPGGSSPVENSDCSTNSR	2 Phospho (STY)	2614	Q9Y2F5	ICE1	Little elongation complex subunit 1	2	6.85265	6.84808	6.62366	6.64965	-1.63573	0.0334637
5309	KLSSERPSSDGEGVVENGITTCNGK	2 Phospho (STY)	2780.17	Q8N556;Q8N556-2	AFAP1	Actin filament-associated protein 1	2	7.84376	7.84362	8.04727	8.02484	1.55729	0.0370654
5339	KNDMDEPPPFDYGSGDEDGKSEK	Phospho (STY)	2636.03	F2Z2R5;Q8TDI0	CHD5	Chromodomain-helicase-DNA-binding protein 5	1	7.28561	7.27806	6.84745	6.90506	-2.54436	0.0418609
5459	KQETAAVCGETDEEAGESGGEGIFR	2 Phospho (STY)	2786.08	Q9ULL5-2;Q9ULL5;Q9ULL5-3	PRR12	Proline-rich protein 12	2	7.44173	7.45853	7.34263	7.32196	-1.3117	0.0142064
5554	KSESPFRETEPLVSPHQDK	2 Phospho (STY)	2370.03	Q9BYW2;Q9BYW2-3;Q9BYW2-2	SETD2	Histone-lysine N-methyltransferase SETD2	2	6.46234	6.48932	6.79116	6.73167	1.93014	0.0346907
5567	KSLPAPVAQRPDSPGGGLQAPGQK	Phospho (STY)	2435.23	Q5JVS0-2;Q5JVS0	HABP4	Intracellular hyaluronan-binding protein 4	1	8.07407	7.9209	7.30993	7.40951	-4.34274	0.0293083
5685	KVTAEADSSSPTGILATSESK	Phospho (STY)	2158	A0MZ66-7;A0MZ66-5;A0MZ66-6;A0MZ66;A0MZ66-3;A0MZ66-8;A0MZ66-4	KIAA1598	Shootin-1	1	7.2999	7.26094	7.45294	7.42433	1.43951	0.0278719
5730	LADILSPR	Phospho (STY)	963.479	Q96PE2	ARHGEF17	Rho guanine nucleotide exchange factor 17	1	6.82119	6.81715	6.63376	6.64396	-1.51462	0.0072651
5787	LDFIESDSPCSSEALSK	Phospho (STY)	1963.81	A0A0A0MSA7;O43432;O43432-3;O43432-4	EIF4G3	Eukaryotic translation initiation factor 4 gamma 3	1	7.05817	6.99079	6.77992	6.7291	-1.86195	0.0281514
5815	LDQPVSAPPSPR	2 Phospho (STY)	1422.59	Q16204	CCDC6	Coiled-coil domain-containing protein 6	2	7.73235	7.66426	6.95405	6.78571	-6.7363	0.0375654
5819	LDSDFNISSHSELENSSELK	2 Phospho (STY)	2409.96	P28290-3;P28290;E9PHV5;P28290-2	SSFA2	Sperm-specific antigen 2	2	6.67377	6.72961	6.51493	6.44051	-1.67482	0.0468969
6103	LKSISREPSPALGPNLDGSGLLPR	3 Phospho (STY)	2713.26	Q9BRZ2	TRIM56	E3 ubiquitin-protein ligase TRIM56	3	8.09389	8.00271	7.47718	7.48407	-3.69553	0.0498189
6142	LLESSLSSSEGEEPVEYK	Phospho (STY)	2061.9	P08648	ITGA5	Integrin alpha-5;Integrin alpha-5 heavy chain;Integrin alpha-5 light chain	1	7.09216	7.1581	7.40568	7.51	2.15134	0.0465379
6267	LPDSDDDEDEETAIQR	Phospho (STY)	1926.74	Q96K21-3;H3BRF9;Q96K21-2;Q96K21;Q96K21-4	ZFYVE19	Abscission/NoCut checkpoint regulator	1	7.32533	7.30618	7.89024	7.80657	3.40917	0.0402691
6307	LPSGSGAASPTGSAVDIR	Phospho (STY)	1721.8	Q09666	AHNAK	Neuroblast differentiation-associated protein AHNAK	1	9.04404	9.02652	8.82959	8.83953	-1.58753	0.00686125
6308	LPSGSGAASPTGSAVDIR	2 Phospho (STY)	1801.76	Q09666	AHNAK	Neuroblast differentiation-associated protein AHNAK	2	8.86384	8.77895	8.51961	8.58637	-1.85525	0.0425284
6532	LSTTPSPTSSLHEDGVEDFRR	2 Phospho (STY)	2490.05	O94842-3;O94842-2;O94842	TOX4	TOX high mobility group box family member 4	2	7.91981	7.92077	7.94107	7.94462	1.0533	0.0371884
6796	MGPSGGEGMEPERRDSQDGSSYR	Oxidation (M);Phospho (STY)	2580	Q14847;Q14847-2;Q14847-3	LASP1	LIM and SH3 domain protein 1	1	7.28465	7.34126	7.01531	6.95725	-2.12164	0.0150855
6829	MKTPADTGFAFPDWAYKPESSPGSR	2 Phospho (STY)	2902.21	P50548	ERF	ETS domain-containing transcription factor ERF	2	6.65454	6.7332	6.20375	6.32918	-2.67548	0.0420591
6929	MSESPTPCSGSSFEETEALVNTAAK	Phospho (STY)	2709.12	D6RAA5;Q4VXL8;E7EMZ9;E9PBC6;O95359-6;O95359-1;O95359-5;O95359-3;O95359;Q4VXL4;O95359-2	TACC2	Transforming acidic coiled-coil-containing protein 2	1	6.94184	7.02503	7.90036	7.77046	7.11173	0.0138857
6975	MVEPENAVTITPLRPEDDYSPR	Phospho (STY)	2608.19	A0A0G2JMS7;A0A0G2JNZ2;Q14160-2;Q14160;A0A0G2JPP5;Q14160-3	SCRIB	Protein scribble homolog	1	6.91004	6.84525	7.05958	7.1024	1.59713	0.0463489
7031	NAVASVQNGPGGGPSSSSIGSASKSDESSTEETDKSR	Phospho (STY)	3646.59	A0A0C4DG98;Q8NI27-2;Q8NI27	THOC2	THO complex subunit 2	1	7.08662	7.17386	6.78791	6.85595	-2.03381	0.0348609
7078	NEEENIYSVPHDSTQGK	Phospho (STY)	2025.83	Q9NRY4	ARHGAP35	Rho GTPase-activating protein 35	1	6.75391	6.58871	7.14402	7.24159	3.3227	0.0497967
7145	NGQLSTINGVAEQDELSLQEGDLNGQK	Phospho (STY)	2936.34	Q02952	AKAP12	A-kinase anchor protein 12	1	7.48688	7.46165	7.30065	7.30843	-1.47819	0.0319769
7172	NHLSPQQGGATPQVPSPCCR	2 Phospho (STY)	2349.94	Q9H4L4	SENP3	Sentrin-specific protease 3	2	7.99563	8.01316	8.18822	8.2317	1.60534	0.0396941
7173	NHLSPQQGGATPQVPSPCCR	3 Phospho (STY)	2429.9	Q9H4L4	SENP3	Sentrin-specific protease 3	3	7.20145	7.18014	7.5519	7.56392	2.32868	0.00365316
7224	NKFGSADNIAHLK	Phospho (STY)	1493.7	G3V207;G5E963;A0A0C4DFR1;Q9ULS5;O75069-2;O75069	TMCC3;TMCC2	Transmembrane and coiled-coil domains protein 3;Transmembrane and coiled-coil domains protein 2	1	6.47532	6.37526	7.18246	7.23761	6.09179	0.0130719
7227	NKGTSDSSSGNVSEGESPPDSQEDSFQGR	Phospho (STY)	3064.22	S5FZ81;Q8WUB8-3;Q8WUB8-2;Q8WUB8	PHF10	PHD finger protein 10	1	7.33126	7.3599	7.17476	7.1414	-1.5399	0.0144199
7530	NSPFQIPPPSPDSK	Phospho (STY)	1589.71	Q86W92-4;Q86W92;Q86W92-3;Q86W92-2	PPFIBP1	Liprin-beta-1	1	7.99917	7.88558	8.37575	8.43738	2.912	0.0361927
7624	NVAEALGHSPKDPGGGGGPVR	Phospho (STY)	2050.96	Q8IU81	IRF2BP1	Interferon regulatory factor 2-binding protein 1	1	7.57283	7.51661	7.30028	7.26246	-1.8338	0.0232423
7678	NYSVGSRPLKPLSPLR	2 Phospho (STY)	1942.94	O60825	PFKFB2	6-phosphofructo-2-kinase/fructose-2,6-bisphosphatase 2;6-phosphofructo-2-kinase;Fructose-2,6-bisphosphatase	2	7.42744	7.44735	7.20629	7.21662	-1.68244	0.00827941
7894	QFTQSPETEASADSFPDTK	Phospho (STY)	2164.88	O15061;H0YL34;A0A075B7B1;O15061-2	SYNM	Synemin	1	7.40817	7.38832	7.52584	7.52278	1.33678	0.0453328
7918	QGPVSQSATQQPVTADKQQGHEPVSPR	Phospho (STY)	2936.38	A0A0A0MRT2;Q9BTA9-5;Q9BTA9-2;Q9BTA9	WAC	WW domain-containing adapter protein with coiled-coil	1	7.55654	7.53127	7.70637	7.69997	1.44299	0.0388732
7991	QKSFSEDVISHK	Phospho (STY)	1483.67	F6QMI7;E9PEB9;E7ERU0;E9PHM6;Q03001-8;Q03001-10;F8W9J4;Q03001	DST	Dystonin	1	7.97295	7.97019	7.76199	7.73963	-1.6625	0.0298161
8054	QLSSSSSYSGDISR	2 Phospho (STY)	1632.61	P33527-8;P33527-6;P33527-7;P33527-5;P33527-4;P33527-2;P33527-3;P33527;P33527-9;A0A0A0MS99	ABCC1	Multidrug resistance-associated protein 1	2	7.07726	6.95532	7.64981	7.71103	4.61457	0.0258179
8096	QNSSDSISSLNSITSHSSIGSSK	Phospho (STY)	2402.06	A0A0A0MRJ3;Q8NEY1-7;Q8NEY1-4;Q8NEY1-2;Q8NEY1-3;Q8NEY1;Q8NEY1-5	NAV1	Neuron navigator 1	1	7.30267	7.20261	6.87739	6.82146	-2.53057	0.0358568
8101	QPDISCILGTGGKSPR	Phospho (STY)	1764.82	G3V1T4;P57740;P57740-2	NUP107	Nuclear pore complex protein Nup107	1	7.69863	7.58624	6.68086	6.57701	-10.3158	0.00578811
8115	QPPGVPNGPSSPTNESAPELPQR	Phospho (STY)	2435.11	Q8TF74-2;Q8TF74	WIPF2	WAS/WASL-interacting protein family member 2	1	7.94662	7.92246	7.65063	7.63826	-1.95028	0.00781243
8124	QPSPSHDGSLSPLQDR	Phospho (STY)	1799.78	Q96A00-2;Q96A00;A0A0B4J2A3	PPP1R14A	Protein phosphatase 1 regulatory subunit 14A	1	9.47817	9.41908	9.21347	9.2401	-1.66662	0.0488689
8503	RGSGSALGGPLDPQFVGPSDTSLGAAPGHR	Phospho (STY)	2940.39	P98174	FGD1	FYVE, RhoGEF and PH domain-containing protein 1	1	7.15053	7.0861	6.87537	6.79954	-1.90923	0.0317551
8633	RKSVPSETVVEDSR	Phospho (STY)	1667.79	P11137-3;P11137	MAP2	Microtubule-associated protein 2	1	7.14826	6.91081	8.09729	7.97067	10.103	0.034993
8707	RLSNVSLTGVSTIR	2 Phospho (STY)	1661.79	F8WBA3;Q15139	PRKD1	Serine/threonine-protein kinase D;Serine/threonine-protein kinase D1	2	6.79084	6.71197	7.03528	6.97033	1.78403	0.0417988
8823	RPPEEDFRHSPEEDFR	Phospho (STY)	2121.89	Q8IXT5	RBM12B	RNA-binding protein 12B	1	7.16451	7.13717	6.88003	6.90488	-1.81293	0.00525811
8825	RPPGGTSPPNGGLPGPLATSAAPPGPPAAASPCLGPVAAAGSGLR	Phospho (STY)	4103.04	Q8WWM7-6;Q8WWM7-8;Q8WWM7-5;Q8WWM7-4;Q8WWM7-9;Q8WWM7-2;Q8WWM7;Q8WWM7-3;H3BUF6;Q8WWM7-7	ATXN2L	Ataxin-2-like protein	1	7.88471	7.96424	7.59154	7.56245	-2.22578	0.047555
8859	RPVSPGKDITAR	Phospho (STY)	1375.7	P31629	HIVEP2	Transcription factor HIVEP2	1	6.1512	6.19751	5.90023	5.92551	-1.82592	0.02198
8883	RQLQEDQENNLQDNQTSNSSPCR	Phospho (STY)	2840.18	Q92576-2;Q92576	PHF3	PHD finger protein 3	1	6.78083	6.75664	6.92357	6.89897	1.38848	0.0143388
9045	RSSQPSPTAVPASDSPPTKQEVK	2 Phospho (STY)	2553.15	Q3KQU3-4;Q3KQU3;Q3KQU3-2	MAP7D1	MAP7 domain-containing protein 1	2	6.8574	6.8673	6.94794	6.97143	1.25122	0.0453517
9073	RTESVPSDINNPVDR	Phospho (STY)	1777.8	A0A0A0MQW1;Q8IVT5-4;Q8IVT5-3;Q8IVT5-2;Q8IVT5	KSR1	Kinase suppressor of Ras 1	1	7.53571	7.61251	7.17496	7.14204	-2.60379	0.0312668
9153	RYEDDGISDDEIEGKR	Phospho (STY)	1975.82	I3VM54;Q9Y2K7-3;Q9Y2K7	KDM2A	Lysine-specific demethylase 2A	1	6.75796	6.79242	7.12138	7.09487	2.15246	0.00549117
9175	SAASREDLVGPEVGASPQSGRK	2 Phospho (STY)	2357.04	Q86X27-3;Q86X27	RALGPS2	Ras-specific guanine nucleotide-releasing factor RalGPS2	2	7.46892	7.3886	7.07744	7.13665	-2.09758	0.0284976
9178	SADGSAPAGEGEGVTLQR	Phospho (STY)	1780.76	Q01650	SLC7A5	Large neutral amino acids transporter small subunit 1	1	7.04114	7.05651	7.17418	7.17844	1.34118	0.0270004
9240	SASDASISSGTHGQYSILQTAR	Phospho (STY)	2316.04	X6R647;E7ER60;O15056-3;O15056-2;O15056	SYNJ2	Synaptojanin-2	1	6.88836	6.90064	7.16785	7.21582	1.98307	0.0393996
9262	SASPSVPGPTKPKPK	Phospho (STY)	1556.8	Q03164-2;Q03164;Q03164-3	KMT2A	Histone-lysine N-methyltransferase 2A;MLL cleavage product N320;MLL cleavage product C180	1	7.32301	7.31771	7.00112	7.01953	-2.0419	0.011549
9676	SGSGSVGNGSSRYSPSQNSPIHHIPSRR	2 Phospho (STY)	3067.34	Q9NYF8-2;Q9NYF8;E9PQN2;E9PKI6;E9PK91;Q9NYF8-3;Q9NYF8-4;E9PJA7	BCLAF1	Bcl-2-associated transcription factor 1	2	7.77196	7.75916	7.91729	7.88604	1.36805	0.0435685
9687	SGSMSLDPAVADGSESETEDSVLETR	2 Phospho (STY)	2828.1	O60447;O60447-2	EVI5	Ecotropic viral integration site 5 protein homolog	2	7.24964	7.25888	7.11457	7.08404	-1.42874	0.0451231
9772	SHSITNMEIGGLK	Phospho (STY)	1465.66	Q96RT1-6;Q96RT1-4;Q96RT1-5;Q96RT1-3;Q96RT1-2;Q96RT1;Q96RT1-8;Q96RT1-7;Q96RT1-9	ERBB2IP	Protein LAP2	1	6.44512	6.38612	6.68761	6.63765	1.76608	0.0252389
9997	SLFFSSKEDIHTSESESK	Phospho (STY)	2136.93	Q52LW3;F8VWZ8	ARHGAP29	Rho GTPase-activating protein 29	1	7.35456	7.32634	7.22506	7.19865	-1.3446	0.0220947
10096	SLQEEHVAVAQLR	Phospho (STY)	1558.75	Q15149-3;Q15149-2;Q15149-7;Q15149-8;Q15149-9;Q15149-5;Q15149-6;Q15149-4;Q15149	PLEC	Plectin	1	7.26458	7.15073	6.86493	6.78705	-2.40804	0.0406205
10139	SLSPILPGR	Phospho (STY)	1018.52	A0A087WZG4;Q6ZSZ5-2;Q6ZSZ5	ARHGEF18	Rho guanine nucleotide exchange factor 18	1	7.72516	7.76153	7.51862	7.51566	-1.68349	0.0496845
10148	SLSPVAAPPLREPR	Phospho (STY)	1568.81	Q8NDT2	RBM15B	Putative RNA-binding protein 15B	1	7.85992	7.79587	7.57939	7.5205	-1.89648	0.0240451
10155	SLSSPTVTLSAPLEGAK	Phospho (STY)	1736.86	Q96PU5-9;Q96PU5-4;Q96PU5-2;Q96PU5-6;Q96PU5-5;Q96PU5-7;Q96PU5	NEDD4L	E3 ubiquitin-protein ligase NEDD4-like	1	7.71064	7.7292	7.57312	7.55127	-1.43788	0.00892018
10246	SNSFNNPLGNR	Phospho (STY)	1298.54	O95835-2;O95835	LATS1	Serine/threonine-protein kinase LATS1	1	7.45279	7.44916	7.64555	7.61838	1.51701	0.0441944
10248	SNSFSDEREFSGPSTPTGTLEFEGGEVSLEGGK	2 Phospho (STY)	3593.48	Q09666	AHNAK	Neuroblast differentiation-associated protein AHNAK	2	8.63456	8.70771	8.36847	8.44173	-1.84515	0.0358359
10308	SPEAVGPELEAEEK	Phospho (STY)	1563.67	Q96N64-3;Q96N64-2;Q96N64	PWWP2A	PWWP domain-containing protein 2A	1	7.30184	7.21527	6.63088	6.48396	-5.02497	0.0259915
10477	SPSGSQRPSVSDDTEHLVNGR	Phospho (STY)	2304.01	P16144-4;P16144-2;P16144-3	ITGB4	Integrin beta-4	1	6.5678	6.52655	6.70995	6.72854	1.48618	0.0423182
10488	SPSLSPSPPSPLEK	2 Phospho (STY)	1581.67	P46821	MAP1B	Microtubule-associated protein 1B;MAP1B heavy chain;MAP1 light chain LC1	2	6.66777	6.66901	6.54327	6.5251	-1.36209	0.0421533
10527	SPSVPKSPTPKSPPSR	2 Phospho (STY)	1807.83	Q9NVD7-2;Q9NVD7;J3KNQ4	PARVA	Alpha-parvin	2	7.84997	7.84936	8.01792	8.01668	1.47108	0.000248743
10652	SQSTTFNPDDMSEPEFKR	Phospho (STY)	2194.89	Q86W92-4;Q86W92;Q86W92-3;Q86W92-2	PPFIBP1	Liprin-beta-1	1	7.92209	7.9467	8.19149	8.2253	1.8793	0.00809658
10727	SRSGSESEEAELSLSLAR	2 Phospho (STY)	2066.86	Q8IV50	LYSMD2	LysM and putative peptidoglycan-binding domain-containing protein 2	2	6.15749	6.19958	6.54597	6.51108	2.23864	0.00686647
10839	SSGEIVYCGQVFEKSPLR	Phospho (STY)	2134.98	M0R1A7;M0R117;Q02543;M0R0P7	RPL18A	60S ribosomal protein L18a	1	7.42523	7.46765	7.20471	7.24563	-1.66444	0.0173366
10879	SSLGQSASETEEDTVSVSKK	Phospho (STY)	2147.95	A0A087WZZ5;Q13435;E9PPJ0	SF3B2	Splicing factor 3B subunit 2	1	7.88082	7.88911	7.83114	7.83637	-1.12513	0.0156418
10943	SSQQPSTPQQAPPGQPQQGTFVAHK	Phospho (STY)	2710.25	E7ERS3;Q86VM9	ZC3H18	Zinc finger CCCH domain-containing protein 18	1	7.38988	7.43635	7.19578	7.22616	-1.59276	0.0270803
11126	STSFRGGMGSGGLATGIAGGLAGMGGIQNEK	Oxidation (M);Phospho (STY)	2934.34	P05783;F8VZY9	KRT18	Keratin, type I cytoskeletal 18	1	7.76676	7.68571	7.35451	7.24841	-2.65934	0.0280258
11173	SVAVSDEEEVEEEAER	Phospho (STY)	1885.75	Q9Y6X9-2;Q9Y6X9	MORC2	MORC family CW-type zinc finger protein 2	1	7.98203	7.94103	7.69333	7.66723	-1.91097	0.0129938
11178	SVDALDDLTPPSTAESGSRSPTSNGGR	2 Phospho (STY)	2833.18	S4R3V8;Q86X29-6;Q86X29-5;Q86X29-2;Q86X29-3;Q86X29-4;Q86X29	LSR	Lipolysis-stimulated lipoprotein receptor	2	6.72445	6.5827	7.22738	7.14792	3.4204	0.0396454
11290	SYGSLVQSACSPVRER	Phospho (STY)	1874.83	Q96S90	LYSMD1	LysM and putative peptidoglycan-binding domain-containing protein 1	1	6.5188	6.54027	6.46707	6.44984	-1.1778	0.0390478
11370	TASISSSPSEGTPTVGSYGCTPQSLPK	Phospho (STY)	2775.23	Q6PKG0;Q6PKG0-3	LARP1	La-related protein 1	1	7.6091	7.59912	7.71311	7.70265	1.26988	0.00486188
11493	TESVPSDINNPVDR	Phospho (STY)	1621.7	A0A0A0MQW1;Q8IVT5-4;Q8IVT5-3;Q8IVT5-2;Q8IVT5	KSR1	Kinase suppressor of Ras 1	1	7.37763	7.40027	7.06222	7.09227	-2.04976	0.00493313
11645	TKPIVKPQTSPEYGQGINPISR	Phospho (STY)	2489.27	O95793-2;O95793-3;O95793;A0A087X1A5	STAU1	Double-stranded RNA-binding protein Staufen homolog 1	1	7.16383	7.15222	6.76368	6.7653	-2.4748	0.00811545
11944	TRDDGDEEGLLTHSEEELEHSQDTDADDGALQ	Phospho (STY)	3606.44	Q9UKM9-2;Q9UKM9	RALY	RNA-binding protein Raly	1	8.48106	8.39022	8.19624	8.12817	-1.87686	0.0469043
12023	TSPSKSPFLHSGMK	Oxidation (M);Phospho (STY)	1598.72	O14497-2;O14497;O14497-3	ARID1A	AT-rich interactive domain-containing protein 1A	1	7.08105	7.0747	7.19889	7.17766	1.28945	0.0441953
12114	TTTAAAVASTGPSSRSPSTLLPK	Phospho (STY)	2280.14	E7EVA0;P27816;P27816-6;P27816-2;P27816-5;P27816-4;F8W9U4	MAP4	Microtubule-associated protein;Microtubule-associated protein 4	1	7.63675	7.82196	6.32249	6.25584	-27.5543	0.0234835
12280	VDHGAEIITQSPGRSSVASPR	4 Phospho (STY)	2482.97	P11137-3;P11137;P11137-2;P11137-4	MAP2	Microtubule-associated protein 2	4	7.24892	7.13154	8.4864	8.40634	18.036	0.00542086
12285	VDIDTPDIDIHGPEGK	Phospho (STY)	1799.8	Q09666	AHNAK	Neuroblast differentiation-associated protein AHNAK	1	7.60421	7.66291	7.41218	7.32701	-1.83639	0.0461976
12494	VKPETPPRQSHSGSISPYPK	2 Phospho (STY)	2351.07	Q9UQ35;Q9UQ35-2	SRRM2	Serine/arginine repetitive matrix protein 2	2	8.74482	8.69927	8.11418	8.17884	-3.76301	0.00714015
12625	VPSVESLFR	Phospho (STY)	1112.53	Q13439-5;Q13439-3;Q13439-4;Q13439;Q86W71	GOLGA4	Golgin subfamily A member 4	1	7.96621	8.02175	7.71687	7.73923	-1.84472	0.0390973
12662	VQSLEGEKLSPKSDISPLTPR	3 Phospho (STY)	2520.13	P46821	MAP1B	Microtubule-associated protein 1B;MAP1B heavy chain;MAP1 light chain LC1	3	8.23646	8.25017	8.3358	8.35576	1.26609	0.0194369
12789	VTTEIQLPSQSPVEEQSPASLSSLR	Phospho (STY)	2762.34	E9PMS6;F8WD26;J3KP06;Q8WWI1-3;Q8WWI1-4;Q8WWI1-2;Q8WWI1;A0A0A0MTE2;E9PMT2;Q8WWI1-5	LMO7	LIM domain only protein 7	1	7.30795	7.27142	6.74003	6.66875	-3.84855	0.0137021
13066	YQQETSVSQLPGRPKSPLSK	Phospho (STY)	2309.14	Q9HCD6;Q9HCD6-2;A0A087WUE1	TANC2	Protein TANC2	1	7.51955	7.60038	7.15735	7.0706	-2.79249	0.0174546
13126	YSSSGSPANSFHFK	Phospho (STY)	1594.65	O00418;H3BRH4	EEF2K	Eukaryotic elongation factor 2 kinase	1	7.1893	7.1796	7.07043	7.05957	-1.31659	0.00389375
13146	YVESDDEKPLDDETVNEDASNENSENDITMQSLPK	Phospho (STY)	4049.67	P46100-4;P46100;P46100-6;A0A087WWG0	ATRX	Transcriptional regulator ATRX	1	7.0109	6.96008	7.25347	7.34527	2.06006	0.0464888
